# Supplementary material for: Distinctive modulation of optical anisotropy by halogens in α/β-Cd–P–X (X = Cl, Br, and I)
Source: Royal Society of Chemistry journal article supplement (doi:10.1039/d1dt01168e), 2021-01-01
Supplement: d1dt01168e1.pdf [file d1dt01168e1.pdf]

*Electronic Supplementary Information:*

## **Distinctive Modulation of Halogen on Optical Anisotropy in $\alpha/\beta$ - Cd-P-X (X = Cl, Br, I)**

Kewang Zhang,<sup>a</sup> Junben Huang,<sup>b</sup> Zhikang Chen,<sup>a</sup> Bei Zhang,<sup>a</sup> Ming-Hsien Lee,<sup>c</sup> Jun Zhang<sup>\*a</sup>

<sup>a</sup> School of Physics Science and Technology, Xinjiang University, Urumqi, Xinjiang 830046, China.

<sup>b</sup> School of Materials Science and Engineering and Key Lab of Non-Ferrous Metal Materials Science and Engineering, Ministry of Education, Central South University, Changsha 410083, Hunan, China.

<sup>c</sup> Department of Physics, Tamkang University, New Taipei 25137, Taiwan

\*Corresponding author E-mail: zhj@xju.edu.cn.

### **Contents**

**Table S1** Calculated NLO coefficients of NCS  $\alpha$ -Cd<sub>2</sub>P<sub>3</sub>X (X = Cl, Br, I) and the largest first-order hyperpolarizabilities  $|\beta_{\max}|$  of [CdP<sub>3</sub>X] groups.

**Table S2** Crystallographic structure data of the title compounds.

**Table S3** Calculated birefringence  $\Delta n$  and optical permittivities  $\Delta\epsilon$  ( $f \rightarrow$  infinity) of  $\alpha/\beta$ -Cd<sub>2</sub>P<sub>3</sub>X (X = Cl, Br, I).

**Table S4** Birefringence and band gap of a series of excellent halide optical crystals.

**Table S5** Static polarization and polarization anisotropy of CsPbX<sub>3</sub> (X = Cl, Br, I).

**Table S6** Cut ionic radius for  $\alpha/\beta$ -Cd<sub>2</sub>P<sub>3</sub>X (X = Cl, Br, I) and Hg<sub>2</sub>P<sub>3</sub>Cl.

**Table S7** Born effective charges of  $\alpha/\beta$ -Cd<sub>2</sub>P<sub>3</sub>X (X = Cl, Br, I).

**Table S8** Atomic bond-valence for  $\alpha/\beta$ -Cd-P-X (X = Cl, Br, I)

**Table S9** Selected bond length for  $\alpha/\beta$ -Cd-P-X (X = Cl, Br, I).

**Figure S1** Calculated band gaps of  $\alpha$ -Cd<sub>2</sub>P<sub>3</sub>Cl (a),  $\alpha$ -Cd<sub>2</sub>P<sub>3</sub>Br (b),  $\alpha$ -Cd<sub>2</sub>P<sub>3</sub>I (c),  $\beta$ -Cd<sub>2</sub>P<sub>3</sub>Cl (d),  $\beta$ -Cd<sub>2</sub>P<sub>3</sub>Br (e),  $\beta$ -Cd<sub>2</sub>P<sub>3</sub>I (f), Hg<sub>2</sub>P<sub>3</sub>Cl (g), and Hg<sub>2</sub>P<sub>3</sub>Br (h).

**Figure S2** Total and partial density of states (T/PDOS) of  $\alpha$ -Cd<sub>2</sub>P<sub>3</sub>Cl (a),  $\alpha$ -Cd<sub>2</sub>P<sub>3</sub>Br (b),  $\alpha$ -Cd<sub>2</sub>P<sub>3</sub>I (c),  $\beta$ -Cd<sub>2</sub>P<sub>3</sub>Cl (d),  $\beta$ -Cd<sub>2</sub>P<sub>3</sub>Br (e),  $\beta$ -Cd<sub>2</sub>P<sub>3</sub>I (f), Hg<sub>2</sub>P<sub>3</sub>Cl (g), and Hg<sub>2</sub>P<sub>3</sub>Br (h).

**Figure S3** Electron-density difference maps for  $\alpha$ -Cd<sub>2</sub>P<sub>3</sub>Cl.

**Figure S4** SHG-density of  $\alpha$ -Cd<sub>2</sub>P<sub>3</sub>Cl (a),  $\alpha$ -Cd<sub>2</sub>P<sub>3</sub>Br (b), and  $\alpha$ -Cd<sub>2</sub>P<sub>3</sub>I (c).

## Nonlinear optical properties

The NLO coefficient is crucial for materials to be applied as second harmonic generation (SHG) conversion crystals. Theoretical NLO coefficients of the target compounds were also performed (listed in Table S1). For  $\alpha$ -Cd<sub>2</sub>P<sub>3</sub>X (X= Cl, Br, I), the largest NLO coefficients are  $d_{33} = 1.39$ ,  $d_{33} = 1.02$ , and  $d_{33} = 1.94$  pm/V, respectively. Unfortunately, the relatively weak SHG response is probably associated with the structural arrangement. To analyze the contribution of an ion (or ionic group) to the SHG response, the SHG-density technique is adopted. It was performed by using the effective SHG of each band as a weighting coefficient to sum the probability densities of all states. The SHG-density caused by ion can be clearly viewed through occupied and unoccupied states, however, the states that do not contribute to SHG response will be invisible. SHG-density can be divided into occupied and unoccupied virtual-electron (VE) and virtual-hole (VH), respectively. The contributions of VE and VH of  $\alpha$ -Cd<sub>2</sub>P<sub>3</sub>Cl,  $\alpha$ -Cd<sub>2</sub>P<sub>3</sub>Br, and  $\alpha$ -Cd<sub>2</sub>P<sub>3</sub>I were 40% and 60%, 57% and 43%, 43% and 57%, respectively (Figure S4). Provides a plot of the predominant contribution from X (X = Cl, Br, I) atoms along in occupied states. As for unoccupied states, SHG-density is concentrated on P atoms. What is more remarkable is that all compounds exhibit the increasing tendency of NLO coefficients which is consistent with their incremental hyperpolarizability because the going up halogen atoms size brings more contribution to the SHG effect (Table 1). Similar regularity can be observed in the cesium germanium halide perovskites CsGeX<sub>3</sub> (X = Cl, Br and I).<sup>1</sup>

**Table S1** Calculated NLO coefficients of NCS  $\alpha$ -Cd<sub>2</sub>P<sub>3</sub>X (X = Cl, Br, I) and the largest first-order hyperpolarizabilities  $|\beta_{\max}|$  of [CdP<sub>3</sub>X] groups.

| Compounds                                   | NLO coefficients (pm/V)                                                                         | $ \beta_{\max} $ (a.u.) |
|---------------------------------------------|-------------------------------------------------------------------------------------------------|-------------------------|
| $\alpha$ -Cd <sub>2</sub> P <sub>3</sub> Cl | $d_{11} = -0.96, d_{15} = 0.12, d_{12} = -0.09, d_{13} = 0.78, d_{24} = 0.53, d_{33} = 1.23$    | 2118.30                 |
| $\alpha$ -Cd <sub>2</sub> P <sub>3</sub> Br | $d_{11} = -0.58, d_{15} = -0.39, d_{12} = -0.18, d_{13} = -0.82, d_{24} = -0.41, d_{33} = 1.33$ | 3936.25                 |
| $\alpha$ -Cd <sub>2</sub> P <sub>3</sub> I  | $d_{11} = -0.08, d_{15} = -0.21, d_{12} = -0.42, d_{13} = -0.75, d_{24} = -0.07, d_{33} = 1.93$ | 4557.03                 |

**Table S2** Crystallographic structure data of the title compounds.

| Compounds                                                  | Space group | Band gap (eV) |       |                      | Symmetry | Volume (Å <sup>3</sup> ) | Unit cell dimensions (Å)         |
|------------------------------------------------------------|-------------|---------------|-------|----------------------|----------|--------------------------|----------------------------------|
|                                                            |             | GGA           | HSE06 | Exp.                 |          |                          |                                  |
| $\alpha$ -Cd <sub>2</sub> P <sub>3</sub> Cl <sup>[2]</sup> | <i>Cc</i>   | 1.28          | 1.99  | /                    | NCS      | 531.24                   | 7.969(1),<br>8.984(2), 7.554(2)  |
| $\alpha$ -Cd <sub>2</sub> P <sub>3</sub> Br <sup>[2]</sup> | <i>Cc</i>   | 1.24          | 1.93  | 1.90 <sup>[2]</sup>  | NCS      | 544.11                   | 8.077(1),<br>9.088(2), 7.534(3)  |
| $\alpha$ -Cd <sub>2</sub> P <sub>3</sub> I <sup>[2]</sup>  | <i>Cc</i>   | 1.27          | 1.85  | 1.83 <sup>[2]</sup>  | NCS      | 569.84                   | 8.243(1),<br>9.334(2), 7.516(2)  |
| $\beta$ -Cd <sub>2</sub> P <sub>3</sub> Cl <sup>[3]</sup>  | <i>C2/c</i> | 1.29          | 1.98  | 1.87 <sup>[3b]</sup> | CS       | 532.62                   | 7.988(1),<br>8.988(1), 7.555(1)  |
| $\beta$ -Cd <sub>2</sub> P <sub>3</sub> Br <sup>[3]</sup>  | <i>C2/c</i> | 1.26          | 1.91  | 1.86 <sup>[3b]</sup> | CS       | 544.95                   | 8.089(1),<br>9.089(1), 7.535(1)  |
| $\beta$ -Cd <sub>2</sub> P <sub>3</sub> I <sup>[3]</sup>   | <i>C2/c</i> | 1.26          | 1.89  | 1.74 <sup>[3b]</sup> | CS       | 568.93                   | 8.255(1),<br>9.304(1), 7.514(1)  |
| Hg <sub>2</sub> P <sub>3</sub> Cl <sup>[4]</sup>           | <i>C2/c</i> | 1.12          | 1.86  | /                    | CS       | 519.91                   | 7.834(2),<br>8.844(11), 7.591(1) |
| Hg <sub>2</sub> P <sub>3</sub> Br <sup>[4]</sup>           | <i>Pbcn</i> | 0.83          | 1.71  | /                    | CS       | 558.16                   | 8.014(1),<br>8.903(1), 7.823(1)  |

**Table S3** Calculated birefringence  $\Delta n$  and optical permittivities  $\Delta\epsilon$  ( $f \rightarrow \text{infinity}$ ) of  $\alpha/\beta\text{-Cd}_2\text{P}_3\text{X}$  (X = Cl, Br, I).

| <b>Compounds</b>                        | <b>Space group</b> | $\epsilon_{xx}$ | $\epsilon_{yy}$ | $\epsilon_{zz}$ | $\Delta\epsilon$ | $\Delta n$ |
|-----------------------------------------|--------------------|-----------------|-----------------|-----------------|------------------|------------|
| $\alpha\text{-Cd}_2\text{P}_3\text{Cl}$ | <i>Cc</i>          | 7.24            | 7.35            | 8.87            | 1.63             | 0.25       |
| $\alpha\text{-Cd}_2\text{P}_3\text{Br}$ | <i>Cc</i>          | 7.81            | 7.84            | 9.08            | 1.27             | 0.19       |
| $\alpha\text{-Cd}_2\text{P}_3\text{I}$  | <i>Cc</i>          | 9.18            | 9.13            | 9.48            | 0.35             | 0.04       |
| $\beta\text{-Cd}_2\text{P}_3\text{Cl}$  | <i>C2/c</i>        | 7.22            | 7.36            | 8.86            | 1.64             | 0.24       |
| $\beta\text{-Cd}_2\text{P}_3\text{Br}$  | <i>C2/c</i>        | 7.87            | 7.86            | 9.09            | 1.23             | 0.17       |
| $\beta\text{-Cd}_2\text{P}_3\text{I}$   | <i>C2/c</i>        | 9.25            | 9.17            | 9.54            | 0.37             | 0.03       |

**Table S4** Birefringence and band gap of a series of excellent halide optical crystals.

| Compounds                                                                          | Space group             | Band gap (eV) | Birefringence (@ 1064 nm)   |
|------------------------------------------------------------------------------------|-------------------------|---------------|-----------------------------|
| HgBr <sub>2</sub> <sup>[5]</sup>                                                   | <i>Cmc2<sub>1</sub></i> | 3.30          | 0.24                        |
| HgI <sub>2</sub> <sup>[6]</sup>                                                    | <i>Cmc2<sub>1</sub></i> | 2.37          | 0.50                        |
| Hg <sub>2</sub> Cl <sub>2</sub> <sup>[7]</sup>                                     | <i>I4/mmm</i>           | 2.90          | 0.54/0.55 (Exp.)            |
| Hg <sub>2</sub> Br <sub>2</sub> <sup>[7]</sup>                                     | <i>I4/mmm</i>           | 2.50          | 0.70/0.67 (Exp.)            |
| Hg <sub>2</sub> I <sub>2</sub> <sup>[8]</sup>                                      | <i>I4/mmm</i>           | 2.10          | 1.08/0.95 (Exp.)            |
| CsGeCl <sub>3</sub> <sup>[9]</sup>                                                 | <i>R3m</i>              | 3.67          | 0.000                       |
| CsGeBr <sub>3</sub> <sup>[10]</sup>                                                | <i>R3m</i>              | 2.32          | 0.001                       |
| CsGeI <sub>3</sub> <sup>[11]</sup>                                                 | <i>R3m</i>              | 1.60          | 0.002                       |
| CsPbCl <sub>3</sub> <sup>[12]</sup>                                                | <i>Pnma</i>             | 2.66 (Cal.)   | 0.104                       |
| CsPbBr <sub>3</sub> <sup>[12]</sup>                                                | <i>Pnma</i>             | 2.17 (Cal.)   | 0.179                       |
| CsPbI <sub>3</sub> <sup>[13]</sup>                                                 | <i>Pnma</i>             | 2.13          | 0.275                       |
| (Cu(PS <sub>3</sub> As <sub>3</sub> ) <sub>4</sub> )Cl <sup>[14]</sup>             | <i>P31c</i>             | 2.89 (Cal.)   | 0.021                       |
| (Cu(PS <sub>3</sub> As <sub>3</sub> ) <sub>4</sub> )Br <sup>[14]</sup>             | <i>P31c</i>             | 2.45 (Cal.)   | 0.024                       |
| NaSb <sub>3</sub> F <sub>10</sub> <sup>[15]</sup>                                  | <i>P6<sub>3</sub></i>   | 4.97          | 0.100                       |
| NaSb <sub>3</sub> Cl <sub>10</sub> * <sup>[16]</sup>                               | <i>P6<sub>3</sub></i>   | 4.49 (Cal.)   | 0.170                       |
| NaSb <sub>3</sub> Br <sub>10</sub> * <sup>[16]</sup>                               | <i>P6<sub>3</sub></i>   | 3.72 (Cal.)   | 0.235                       |
| NaSb <sub>3</sub> I <sub>10</sub> * <sup>[16]</sup>                                | <i>P6<sub>3</sub></i>   | 2.59 (Cal.)   | 0.367                       |
| SbF <sub>3</sub> <sup>[17]</sup>                                                   | <i>Cmm2</i>             | 4.29          | 0.145                       |
| SbCl <sub>3</sub> * <sup>[16]</sup>                                                | <i>Cmm2</i>             | 4.05 (Cal.)   | 0.212                       |
| SbBr <sub>3</sub> * <sup>[16]</sup>                                                | <i>Cmm2</i>             | 3.30 (Cal.)   | 0.295                       |
| SbI <sub>3</sub> * <sup>[16]</sup>                                                 | <i>Cmm2</i>             | 1.95 (Cal.)   | 0.924                       |
| Sn <sub>2</sub> B <sub>5</sub> O <sub>9</sub> Cl <sup>[18]</sup>                   | <i>Pnn2</i>             | 3.53          | 0.189/0.168 (Exp.) @ 546 nm |
| Sn <sub>2</sub> B <sub>5</sub> O <sub>9</sub> Br <sup>[19]</sup>                   | <i>Pnn2</i>             | 3.11          | 0.464/0.439 (Exp.) @ 546 nm |
| Sn <sub>2</sub> B <sub>5</sub> O <sub>9</sub> I* <sup>[19]</sup>                   | <i>Pnn2</i>             | 2.99 (Cal.)   | 0.70 @ 546 nm               |
| Pb <sub>2</sub> B <sub>5</sub> O <sub>9</sub> Cl <sup>[20]</sup>                   | <i>Pnn2</i>             | 3.96          | 0.081/0.067 (Exp.) @ 546 nm |
| Pb <sub>2</sub> B <sub>5</sub> O <sub>9</sub> Br <sup>[21]</sup>                   | <i>Pnn2</i>             | 3.30          | 0.118/0.130 (Exp.) @ 546 nm |
| Pb <sub>2</sub> B <sub>5</sub> O <sub>9</sub> I <sup>[22]</sup>                    | <i>Pnn2</i>             | 3.10          | 0.32 @ 546 nm               |
| Pb <sub>6</sub> Ba <sub>2</sub> (BO <sub>3</sub> ) <sub>5</sub> Cl <sup>[23]</sup> | <i>C2/m</i>             | 3.70          | 0.16 @ 532 nm               |
| Pb <sub>6</sub> Ba <sub>2</sub> (BO <sub>3</sub> ) <sub>5</sub> Br <sup>[23]</sup> | <i>C2/m</i>             | 3.60          | 0.18 @ 532 nm               |

\* Represents hypothetical crystal.

**Table S5** Static polarization and polarization anisotropy of CsPbX<sub>3</sub> (X = Cl, Br, I).

| Compound            | Space group | Species           | $\Delta\alpha$ | Static polarization |           |           |           |           |           |
|---------------------|-------------|-------------------|----------------|---------------------|-----------|-----------|-----------|-----------|-----------|
|                     |             |                   |                | <i>xx</i>           | <i>xy</i> | <i>yy</i> | <i>xz</i> | <i>yz</i> | <i>zz</i> |
| CsPbCl <sub>3</sub> | <i>Pnma</i> | PbCl <sub>6</sub> | 1.25           | 66.40               | 0.24      | 66.69     | 0.11      | 0.65      | 66.72     |
| CsPbBr <sub>3</sub> | <i>Pnma</i> | PbBr <sub>6</sub> | 2.36           | 95.29               | 1.07      | 95.98     | -0.03     | 0.76      | 95.88     |
| CsPbI <sub>3</sub>  | <i>Pnma</i> | PbI <sub>6</sub>  | 8.46           | 146.09              | -1.38     | 144.24    | -3.68     | -2.49     | 147.14    |

**Table S6** Cut ionic radius for  $\alpha/\beta$ -Cd<sub>2</sub>P<sub>3</sub>X (X = Cl, Br, I) and Hg<sub>2</sub>P<sub>3</sub>Cl.

| Compound                                    | Atom | Charge | Cut radius (Å) |
|---------------------------------------------|------|--------|----------------|
| $\alpha$ -Cd <sub>2</sub> P <sub>3</sub> Cl | Cd   | +2     | 1.27           |
|                                             | P    | -1     | 1.46           |
|                                             | Cl   | -1     | 1.41           |
| $\alpha$ -Cd <sub>2</sub> P <sub>3</sub> Br | Cd   | +2     | 1.27           |
|                                             | P    | -1     | 1.43           |
|                                             | Br   | -1     | 1.50           |
| $\alpha$ -Cd <sub>2</sub> P <sub>3</sub> I  | Cd   | +2     | 1.28           |
|                                             | P    | -1     | 1.46           |
|                                             | I    | -1     | 1.62           |
| $\beta$ -Cd <sub>2</sub> P <sub>3</sub> Cl  | Cd   | +2     | 1.27           |
|                                             | P    | -1     | 1.43           |
|                                             | Cl   | -1     | 1.43           |
| $\beta$ -Cd <sub>2</sub> P <sub>3</sub> Br  | Cd   | +2     | 1.27           |
|                                             | P    | -1     | 1.45           |
|                                             | Br   | -1     | 1.50           |
| $\beta$ -Cd <sub>2</sub> P <sub>3</sub> I   | Cd   | +2     | 1.28           |
|                                             | P    | -1     | 1.47           |
|                                             | I    | -1     | 1.73           |
| Hg <sub>2</sub> P <sub>3</sub> Cl           | Hg   | +2     | 1.26           |
|                                             | P    | -1     | 1.15           |
|                                             | Cl   | -1     | 1.55           |

**Table S7** Born effective charges of  $\alpha/\beta$ -Cd<sub>2</sub>P<sub>3</sub>X (X = Cl, Br, I).

| Compound                                    | Atoms           | $q_{xx}$ | $q_{yy}$ | $q_{zz}$ | $\Delta q$ |
|---------------------------------------------|-----------------|----------|----------|----------|------------|
| $\alpha$ -Cd <sub>2</sub> P <sub>3</sub> Cl | Cd <sub>1</sub> | 2.264    | 2.178    | 2.175    | -0.002     |
|                                             | Cd <sub>2</sub> | 2.285    | 2.174    | 2.190    | 0.016      |
|                                             | Cl              | -1.998   | -1.879   | -1.071   | 0.808      |
|                                             | P <sub>1</sub>  | -0.876   | -0.811   | -1.418   | -0.607     |
|                                             | P <sub>2</sub>  | -0.786   | -0.831   | -0.440   | 0.391      |
|                                             | P <sub>3</sub>  | -0.890   | -0.830   | -1.437   | -0.607     |
| $\alpha$ -Cd <sub>2</sub> P <sub>3</sub> Br | Cd <sub>1</sub> | 2.41     | 2.33     | 2.19     | -0.140     |
|                                             | Cd <sub>2</sub> | 2.39     | 2.33     | 2.17     | -0.164     |
|                                             | Br              | -2.11    | -2.07    | -1.06    | 1.011      |
|                                             | P <sub>1</sub>  | -0.91    | -0.88    | -1.44    | -0.565     |
|                                             | P <sub>2</sub>  | -0.87    | -0.86    | -0.44    | 0.416      |
|                                             | P <sub>3</sub>  | -0.92    | -0.87    | -1.43    | -0.558     |
| $\alpha$ -Cd <sub>2</sub> P <sub>3</sub> I  | Cd <sub>1</sub> | 2.69     | 2.65     | 2.19     | -0.466     |
|                                             | Cd <sub>2</sub> | 2.67     | 2.65     | 2.17     | -0.487     |
|                                             | I               | -2.30    | -2.34    | -1.04    | 1.302      |
|                                             | P <sub>1</sub>  | -0.99    | -0.99    | -1.42    | -0.434     |
|                                             | P <sub>2</sub>  | -1.08    | -0.99    | -0.48    | 0.511      |
|                                             | P <sub>3</sub>  | -0.98    | -0.99    | -1.42    | -0.425     |
| $\beta$ -Cd <sub>2</sub> P <sub>3</sub> Cl  | Cd              | 2.26     | 2.17     | 2.18     | -0.087     |
|                                             | Cl              | -2.00    | -1.87    | -1.07    | 0.924      |
|                                             | P <sub>1</sub>  | -0.88    | -0.81    | -1.42    | -0.533     |
|                                             | P <sub>2</sub>  | -0.76    | -0.85    | -0.45    | 0.315      |
|                                             |                 |          |          |          |            |
| $\beta$ -Cd <sub>2</sub> P <sub>3</sub> Br  | Cd              | 2.40     | 2.31     | 2.18     | -0.224     |
|                                             | Br              | -2.09    | -2.03    | -1.05    | 1.035      |
|                                             | P <sub>1</sub>  | -0.90    | -0.87    | -1.43    | -0.524     |
|                                             | P <sub>2</sub>  | -0.91    | -0.84    | -0.45    | 0.462      |
|                                             |                 |          |          |          |            |
| $\beta$ -Cd <sub>2</sub> P <sub>3</sub> I   | Cd              | 2.68     | 2.64     | 2.19     | -0.489     |
|                                             | I               | -2.32    | -2.33    | -1.07    | 1.242      |
|                                             | P <sub>1</sub>  | -0.99    | -0.98    | -1.42    | -0.432     |
|                                             | P <sub>2</sub>  | -1.42    | -0.99    | -0.48    | 0.940      |

**Table S8** Atomic bond-valence for  $\alpha/\beta$ -Cd-P-X (X = Cl, Br, I) [2-3a].

| Compound                                    | Atom  | X      | Y     | Z      | BVS   |
|---------------------------------------------|-------|--------|-------|--------|-------|
| $\alpha$ -Cd <sub>2</sub> P <sub>3</sub> Cl | Cd(1) | 0.000  | 0.149 | 0.000  | 2.081 |
|                                             | Cd(2) | 0.494  | 0.144 | 0.080  | 2.161 |
|                                             | P(1)  | 0.116  | 0.046 | 0.318  | 1.159 |
|                                             | P(2)  | -0.258 | 0.296 | 0.038  | 1.342 |
|                                             | P(3)  | 0.366  | 0.045 | -0.240 | 1.133 |
|                                             | Cl(1) | 0.253  | 0.345 | -0.004 | 0.690 |
| $\alpha$ -Cd <sub>2</sub> P <sub>3</sub> Br | Cd(1) | 0.000  | 0.147 | 0.000  | 2.217 |
|                                             | Cd(2) | 0.504  | 0.147 | 0.080  | 2.122 |
|                                             | P(1)  | 0.130  | 0.038 | 0.315  | 1.080 |
|                                             | P(2)  | -0.250 | 0.292 | 0.005  | 1.409 |
|                                             | P(3)  | 0.378  | 0.040 | -0.210 | 1.198 |
|                                             | Br(1) | 0.249  | 0.374 | 0.070  | 0.653 |
| $\alpha$ -Cd <sub>2</sub> P <sub>3</sub> I  | Cd(1) | 0.000  | 0.141 | 0.000  | 1.892 |
|                                             | Cd(2) | 0.500  | 0.145 | 0.069  | 2.386 |
|                                             | P(1)  | 0.147  | 0.043 | 0.324  | 0.897 |
|                                             | P(2)  | -0.258 | 0.290 | 0.040  | 1.235 |
|                                             | P(3)  | 0.388  | 0.044 | -0.239 | 1.175 |
|                                             | I(1)  | 0.240  | 0.374 | 0.060  | 0.971 |
| $\beta$ -Cd <sub>2</sub> P <sub>3</sub> Cl  | Cd(1) | 0.245  | 0.356 | 0.290  | 2.027 |
|                                             | P(1)  | 0.376  | 0.047 | 0.031  | 1.173 |
|                                             | P(2)  | 0.000  | 0.709 | 0.250  | 1.319 |
|                                             | Cl(1) | 0.000  | 0.126 | 0.250  | 0.518 |
| $\beta$ -Cd <sub>2</sub> P <sub>3</sub> Br  | Cd(1) | 0.245  | 0.356 | 0.290  | 2.095 |
|                                             | P(1)  | 0.376  | 0.047 | 0.031  | 1.139 |
|                                             | P(2)  | 0.000  | 0.709 | 0.250  | 1.226 |
|                                             | Br(1) | 0.000  | 0.126 | 0.250  | 0.684 |
| $\beta$ -Cd <sub>2</sub> P <sub>3</sub> I   | Cd(1) | 0.245  | 0.356 | 0.290  | 2.124 |
|                                             | P(1)  | 0.376  | 0.047 | 0.031  | 1.069 |
|                                             | P(2)  | 0.000  | 0.709 | 0.250  | 1.074 |
|                                             | I(1)  | 0.000  | 0.126 | 0.250  | 1.034 |



**Table S9** Selected bond length for  $\alpha/\beta$ -Cd-P-X (X = Cl, Br, I) [2-3a].

| $\alpha$ -Cd <sub>2</sub> P <sub>3</sub> Cl |         | $\alpha$ -Cd <sub>2</sub> P <sub>3</sub> Br |         | $\alpha$ -Cd <sub>2</sub> P <sub>3</sub> I |         |
|---------------------------------------------|---------|---------------------------------------------|---------|--------------------------------------------|---------|
| Cd(1)-P(1)                                  | = 2.508 | Cd(1)-P(1)                                  | = 2.529 | Cd(1)-P(1)                                 | = 2.591 |
| Cd(1)-P(1)                                  | = 2.579 | Cd(1)-P(1)                                  | = 2.612 | Cd(1)-P(1)                                 | = 2.689 |
| Cd(1)-P(2)                                  | = 2.505 | Cd(1)-P(2)                                  | = 2.417 | Cd(1)-P(2)                                 | = 2.601 |
| Cd(1)-Cl(1)                                 | = 2.681 | Cd(1)-Br(1)                                 | = 2.863 | Cd(1)-I(1)                                 | = 2.923 |
| Cd(1)-Cl(1)                                 | = 3.363 | Cd(1)-Br(1)                                 | = 3.305 | Cd(1)-I(1)                                 | = 3.367 |
| Cd(2)-P(3)                                  | = 2.508 | Cd(2)-P(3)                                  | = 2.441 | Cd(2)-P(3)                                 | = 2.451 |
| Cd(2)-P(3)                                  | = 2.598 | Cd(2)-P(3)                                  | = 2.646 | Cd(2)-P(3)                                 | = 2.524 |
| Cd(2)-P(2)                                  | = 2.471 | Cd(2)-P(2)                                  | = 2.531 | Cd(2)-P(2)                                 | = 2.550 |
| Cd(2)-Cl(1)                                 | = 2.626 | Cd(2)-Br(1)                                 | = 2.907 | Cd(2)-I(1)                                 | = 3.019 |
| Cd(2)-Cl(1)                                 | = 3.423 | Cd(2)-Br(1)                                 | = 3.183 | Cd(2)-I(1)                                 | = 3.219 |
| P(1)-P(2)                                   | = 2.271 | P(1)-P(2)                                   | = 2.209 | P(1)-P(2)                                  | = 2.290 |
| P(1)-P(3)                                   | = 2.271 | P(1)-P(3)                                   | = 2.686 | P(1)-P(3)                                  | = 2.269 |
| P(3)-P(2)                                   | = 2.282 | P(3)-P(2)                                   | = 2.686 | P(3)-P(2)                                  | = 2.435 |
| $\beta$ -Cd <sub>2</sub> P <sub>3</sub> Cl  |         | $\beta$ -Cd <sub>2</sub> P <sub>3</sub> Br  |         | $\beta$ -Cd <sub>2</sub> P <sub>3</sub> I  |         |
| Cd(1)-P(1)                                  | = 2.495 | Cd(1)-P(1)                                  | = 2.508 | Cd(1)-P(1)                                 | = 2.537 |
| Cd(1)-P(1)                                  | = 2.585 | Cd(1)-P(1)                                  | = 2.593 | Cd(1)-P(1)                                 | = 2.610 |
| Cd(1)-P(2)                                  | = 2.494 | Cd(1)-P(2)                                  | = 2.521 | Cd(1)-P(2)                                 | = 2.570 |
| Cd(1)-Cl(1)                                 | = 2.819 | Cd(1)-Br(1)                                 | = 2.854 | Cd(1)-I(1)                                 | = 2.920 |
| Cd(1)-Cl(1)                                 | = 3.224 | Cd(1)-Br(1)                                 | = 3.259 | Cd(1)-I(1)                                 | = 3.328 |
| P(1)-P(1)                                   | = 2.286 | P(1)-P(1)                                   | = 2.308 | P(1)-P(1)                                  | = 2.348 |
| P(1)-P(2)                                   | = 2.283 | P(1)-P(2)                                   | = 2.301 | P(1)-P(2)                                  | = 2.335 |

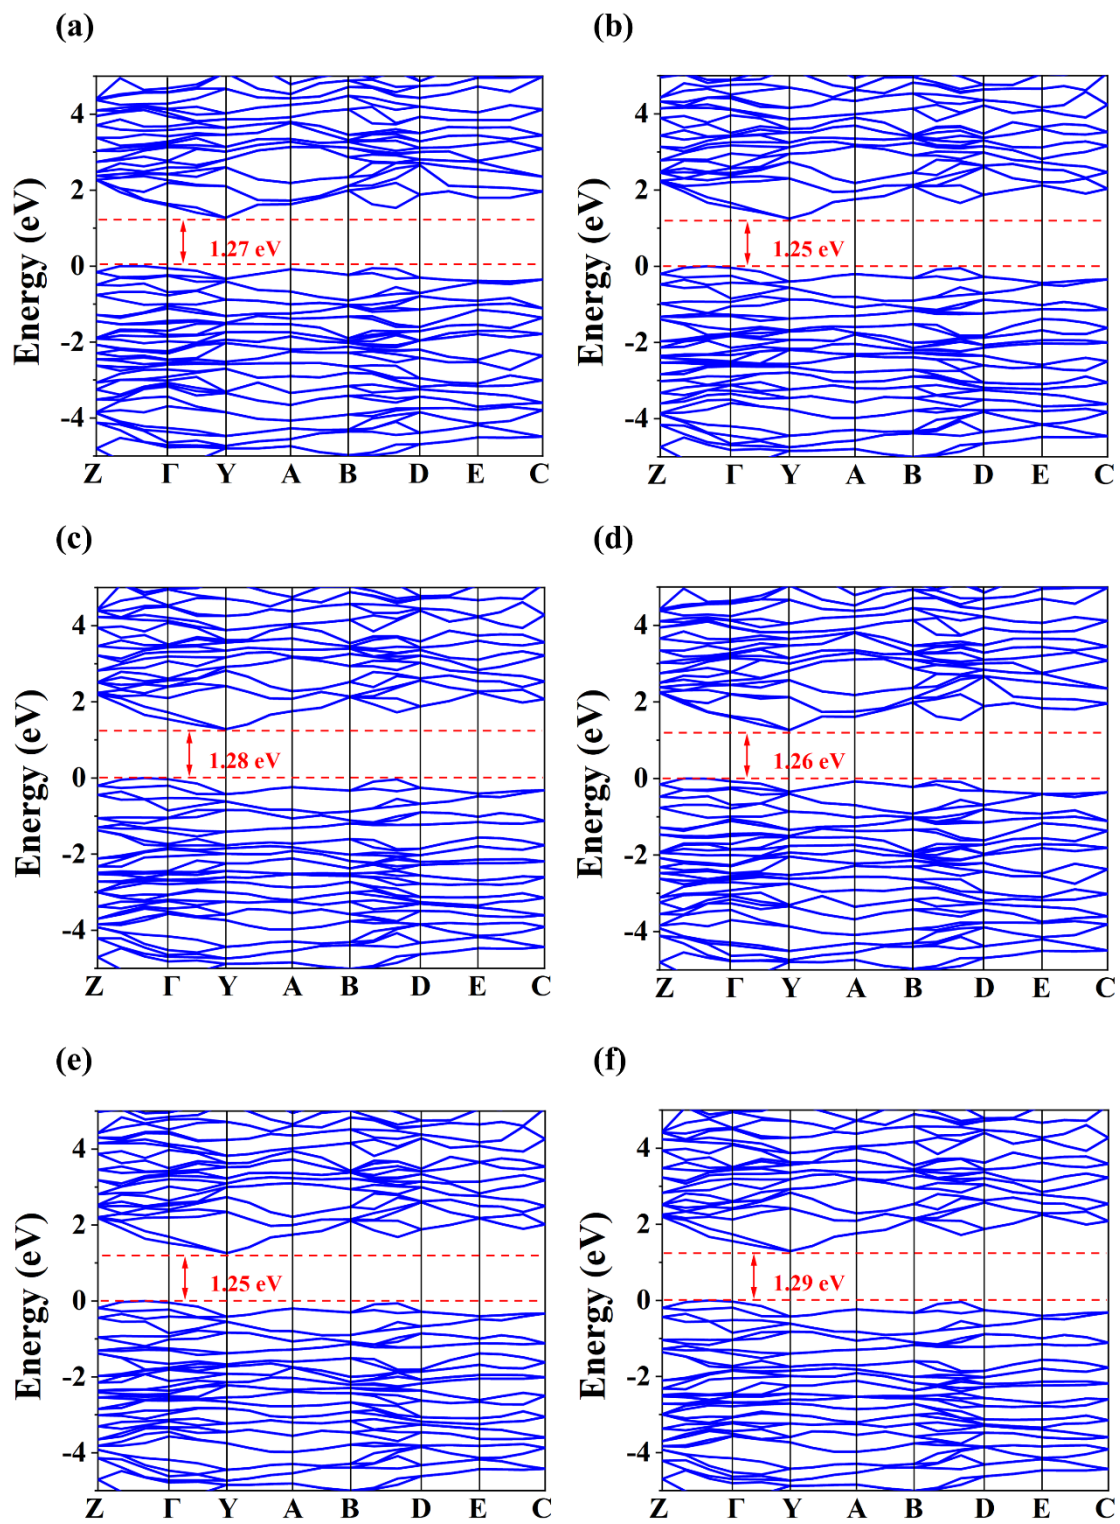

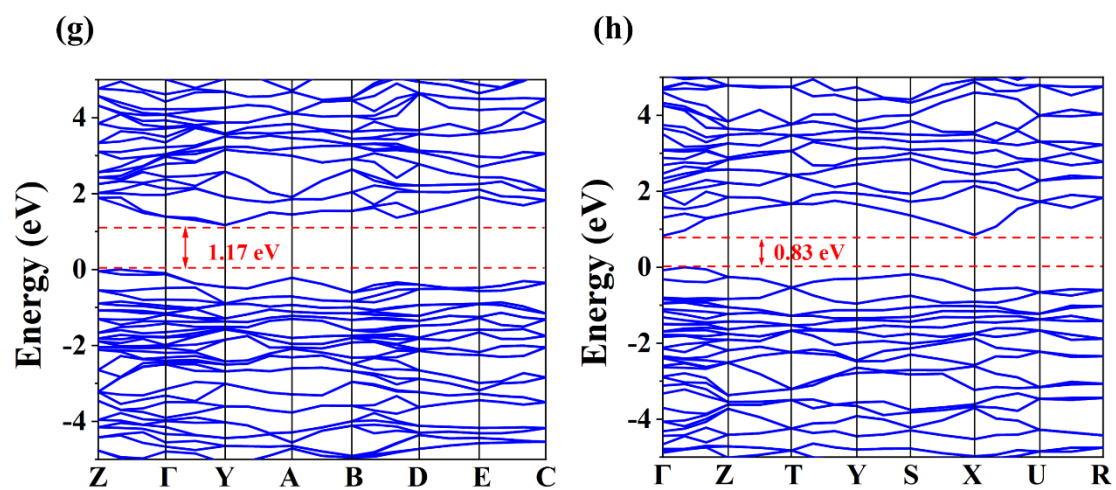

**Figure S1** Calculated band gaps of  $\alpha$ -Cd<sub>2</sub>P<sub>3</sub>Cl (a),  $\alpha$ -Cd<sub>2</sub>P<sub>3</sub>Br (b),  $\alpha$ -Cd<sub>2</sub>P<sub>3</sub>I (c),  $\beta$ -Cd<sub>2</sub>P<sub>3</sub>Cl (d),  $\beta$ -Cd<sub>2</sub>P<sub>3</sub>Br (e),  $\beta$ -Cd<sub>2</sub>P<sub>3</sub>I (f), Hg<sub>2</sub>P<sub>3</sub>Cl (g), and Hg<sub>2</sub>P<sub>3</sub>Br (h).

**(a)**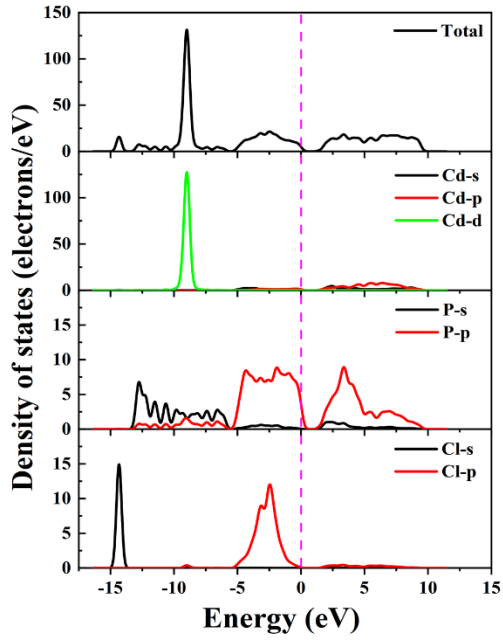**(b)**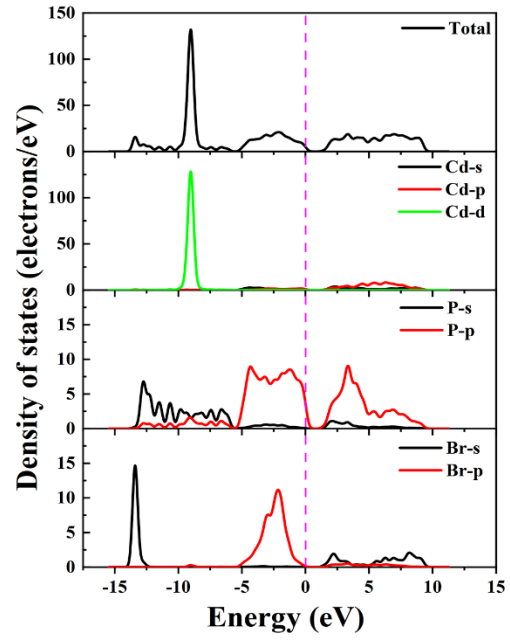**(c)**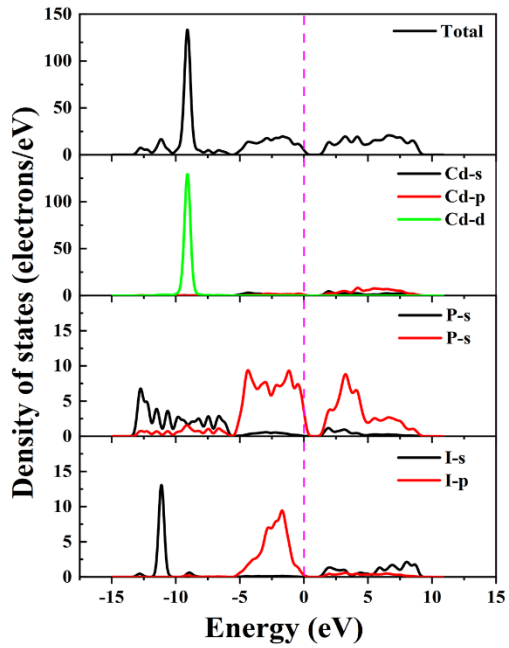**(d)**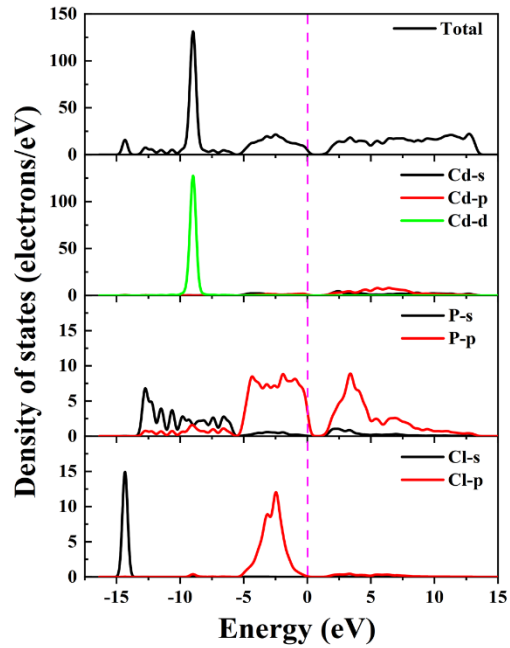

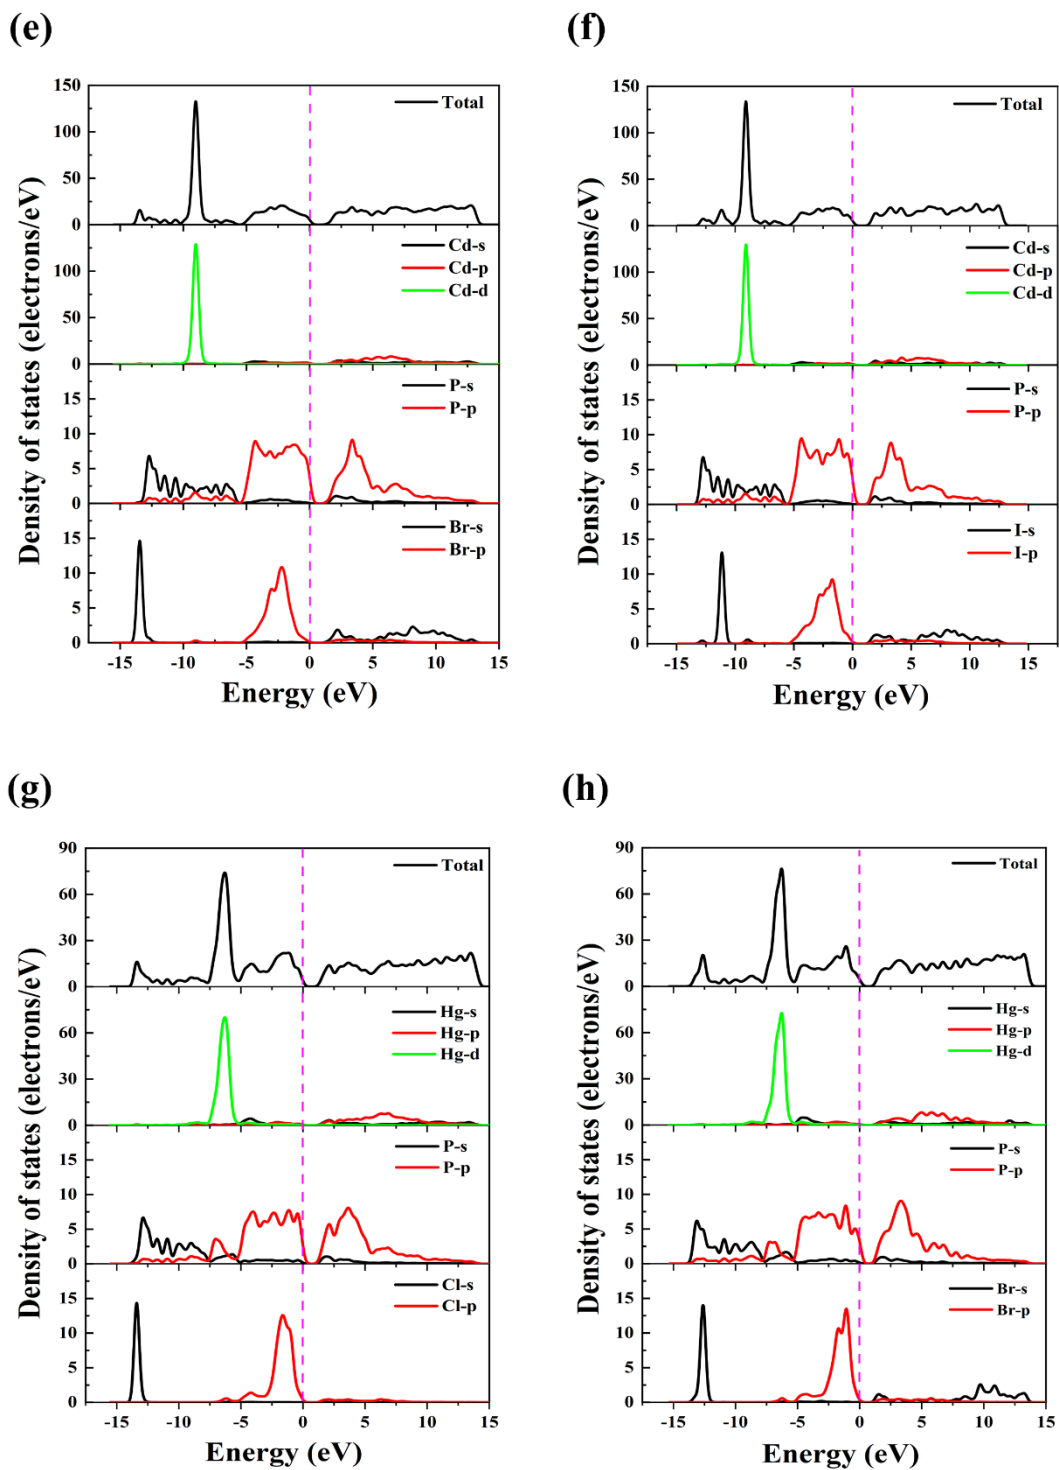

**Figure S2** Total and partial density of states (T/PDOS) of  $\alpha$ - $\text{Cd}_2\text{P}_3\text{Cl}$  (a),  $\alpha$ - $\text{Cd}_2\text{P}_3\text{Br}$  (b),  $\alpha$ - $\text{Cd}_2\text{P}_3\text{I}$  (c),  $\beta$ - $\text{Cd}_2\text{P}_3\text{Cl}$  (d),  $\beta$ - $\text{Cd}_2\text{P}_3\text{Br}$  (e),  $\beta$ - $\text{Cd}_2\text{P}_3\text{I}$  (f),  $\text{Hg}_2\text{P}_3\text{Cl}$  (g), and  $\text{Hg}_2\text{P}_3\text{Br}$  (h).

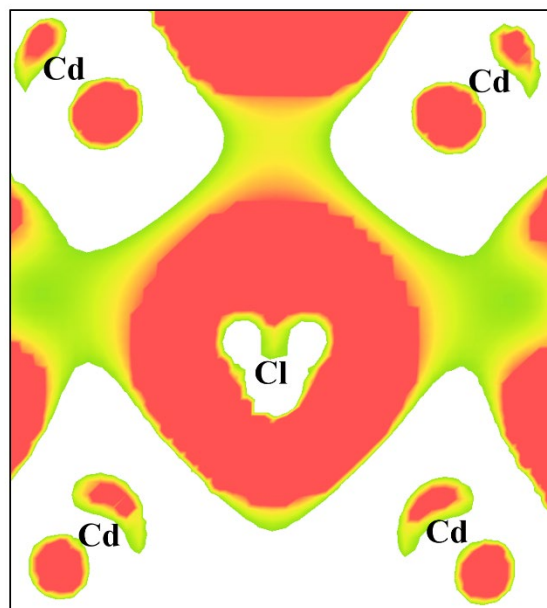

**Figure S3** Electron-density difference maps for  $\alpha$ - $\text{Cd}_2\text{P}_3\text{Cl}$ .

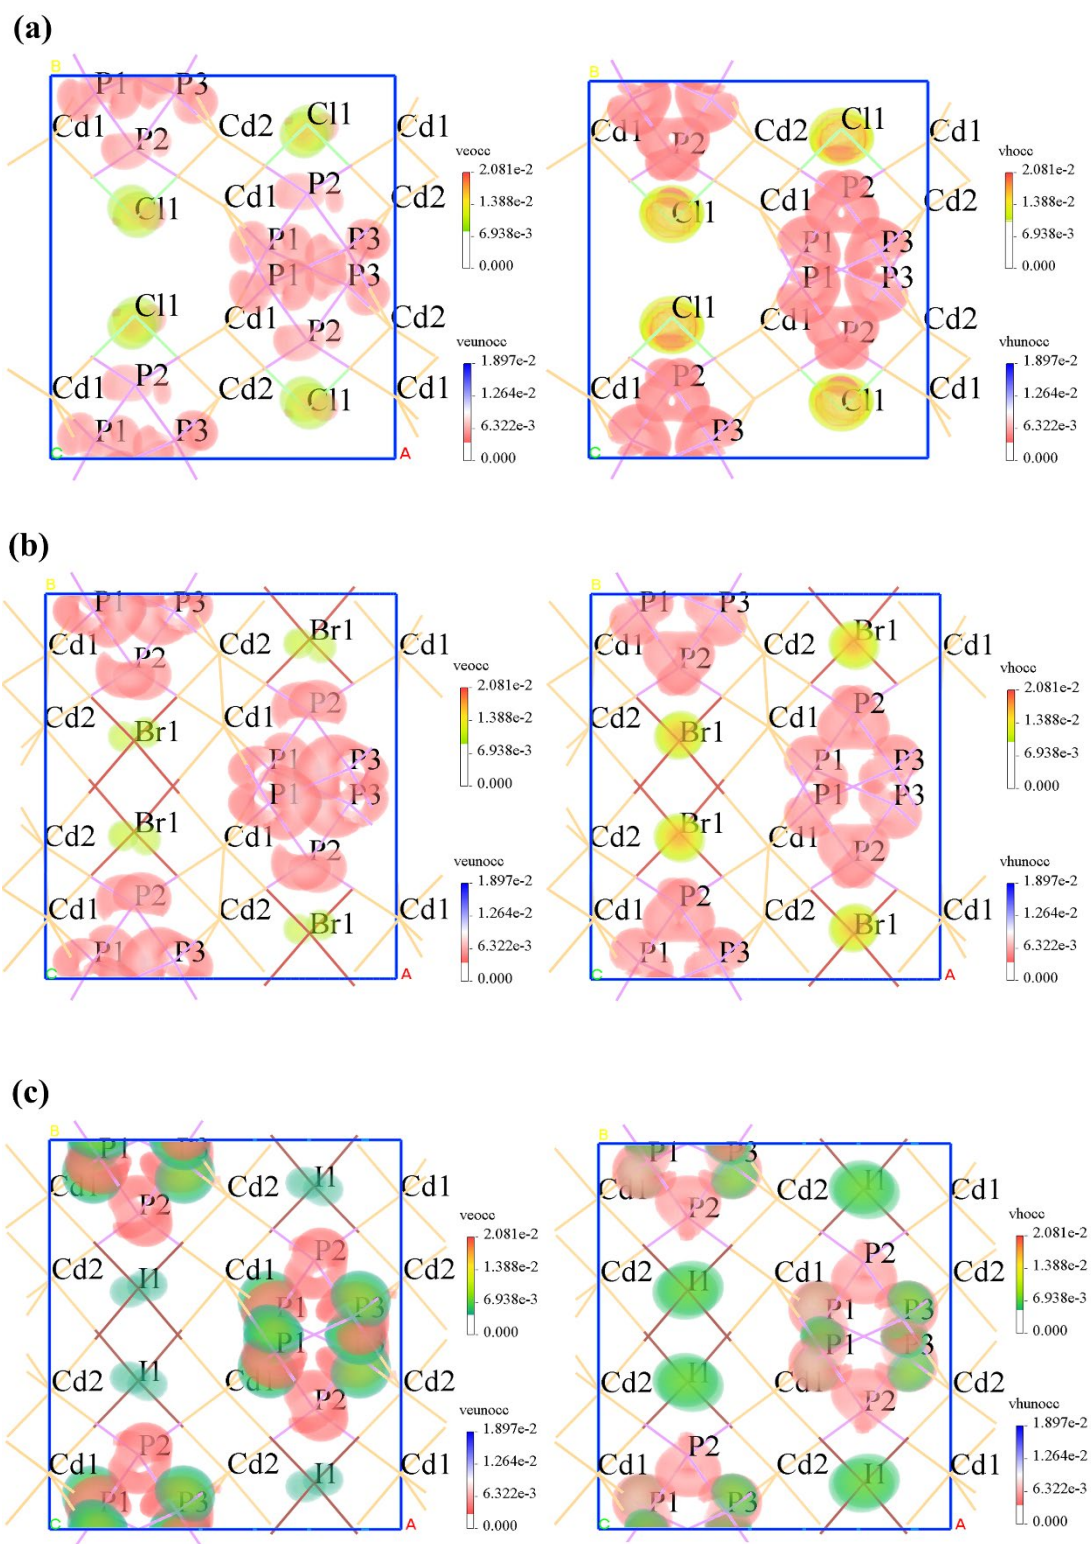

**Figure S4** SHG-density of  $\alpha$ - $\text{Cd}_2\text{P}_3\text{Cl}$  (a),  $\alpha$ - $\text{Cd}_2\text{P}_3\text{Br}$  (b), and  $\alpha$ - $\text{Cd}_2\text{P}_3\text{I}$  (c).

## Reference

- [1] G. Walters, E. H. Sargent, Electrooptic Response in Germanium Halide Perovskites, *J. Phys. Chem. Lett.*, 2018, **9**, 1018-1027.
- [2] A. Rebbah, J. Yazbeck, R. Lande, A. Deschanvres, Etudes structurales et optiques des phases du type  $Cd_2A_3X$  (A= As, P; X= Cl, Br, I) et de leur solution solide, *Mater. Res. Bull.*, 1981, **16**, 525-533.
- [3] (a) P. C. Donohue, The Synthesis and Properties of  $Cd_2P_3Cl$ ,  $Cd_2P_3Br$ , and  $Cd_2P_3I$ , *J. Solid State Chem.*, 1972, **5**, 71-74; (b) A. Roy, A. Singh, S. A. Aravindh, S. Servottam, U. V. Waghmare, C. N. R. Rao, Structural Features and HER activity of Cadmium Phosphohalides, *Angew. Chem. Int. Ed.*, 2019, **58**, 6926-6931.
- [4] A. V. Shevelkov, E. V. Dikarev, B. A. Popovkin, Helical  $^{1/2}$ Chains in the Structures of  $Hg_2P_3Br$  and  $Hg_2P_3Cl$ , *Z. Kristallogr.*, 1994, **209**, 583-585.
- [5] T. Liu, J. G. Qin, G. Zhang, T. Zhu, F. Niu, Y. Wu, C. Chen, Mercury Bromide ( $HgBr_2$ ): A Promising Nonlinear Optical Material in IR Region with a High Laser Damage Threshold, *Appl. Phys. Lett.*, 2008, **93**, 091102-091106.
- [6] X. Shi, Z. Ma, C. He, K. Wu, Strong SHG Responses Predicted in Binary Metal Halide Crystal  $HgI_2$ , *Chem. Phys. Lett.*, 2014, **608**, 219-223.
- [7] C. Barta, C. Barta Jr, Physical Properties of Single Crystals of the Calomel Group ( $Hg_2X_2$ : X = Cl, Br)<sup>1</sup>, *Mater. Sci. Forum.*, 1991, **61**, 93-150.
- [8] M. Kars, T. Roisnel, V. Dorcet, A. Rebbah, O. D. Carlos, (2012). Redetermination of  $Hg_2I_2$ , *Acta Crystallogr. E*, 2012, **68**, i11-i11.
- [9] K. Yamada, K. Isobe, T. Okuda, Y. Furukawa, Successive Phase Transitions and High Ionic Conductivity of Trichlorogermanate (II) Salts as Studied by  $^{35}Cl$  NQR and Powder X-Ray Diffraction. *Z. Naturforsch., A: Phys. Sci.*, 1994, **49**, 258-266.
- [10] L. C. Tang, J. Y. Huang, C. S. Chang, M. H. Lee, L. Q. Liu, New Infrared Nonlinear Optical Crystal  $CsGeBr_3$ : Synthesis, Structure and Powder Second-Harmonic Generation Properties, *J. Phys.: Condens. Matter.*, 2005, **17**, 7275-7286.
- [11] C. C. Stoumpos, L. Frazer, D. J. Clark, Y. S. Kim, S. H. Rhim, A. J. Freeman, J. B. Ketterson, J. I. Jang, M. G. Kanatzidis, Hybrid Germanium Iodide Perovskite Semiconductors: Active Lone Pairs, Structural Distortions, Direct and Indirect Energy Gaps, and Strong Nonlinear Optical Properties, *J. Am. Chem. Soc.*, 2015, **137**, 6804-6819.
- [12] M. R. Linaburg, E. T. McClure, J. D. Majher, P. M. Woodward,  $Cs_{1-x}Rb_xPbCl_3$  and  $Cs_{1-x}Rb_xPbBr_3$  Solid Solutions: Understanding Octahedral Tilting in Lead Halide Perovskites, *Chem. Mater.*, 2017, **29**, 3507-3514.
- [13] R. J. Sutton, M. R. Filip, A. A. Haghighirad, N. Sakai, B. Wenger, F. Giustino, H. J. Snaith, Cubic or Orthorhombic? Revealing the Crystal Structure of Metastable Black-Phase  $CsPbI_3$  by Theory and Experiment, *ACS Energy Lett.*, 2018, **3**, 1787-1794.
- [14] P. Schwarz, J. Wachter, M. Zabel,  $PAs_3S_3$  cage as a new building block in copper halide coordination polymers, *Inorg. Chem.*, 2011, **50**, 8477-8483.
- [15] G. Zhang, J. G. Qin, T. Liu, Y. J. Li, Y. C. Wu, C. T. Chen,  $NaSb_3F_{10}$ : A New Second-Order Nonlinear Optical Crystal to be Used in the IR Region with Very High Laser Damage Threshold, *Appl. Phys. Lett.*, 2009, **95**, 261104-261104.
- [16] L. Kang, D. M. Ramo, Z. S. Lin, P. D. Bristowe, J. G. Qin, C. T. Chen, First Principles Selection and Design of Mid-IR Nonlinear Optical Halide Crystals, *J. Mater. Chem. C*, 2013, **1**, 7363-7370.



- [17] G. Zhang, T. Liu, T. X. Zhu, J. G. Qin, Y. C. Wu, C. T. Chen, SbF<sub>3</sub>: A New Second-Order Nonlinear Optical Material, *Opt. Mater.*, 2008, **31**, 110-113.
- [18] J. Y. Guo, A. Tudi, S. J. Han, Z. H. Yang, S. L. Pan, Sn<sub>2</sub>B<sub>5</sub>O<sub>9</sub>Cl: A Material with Large Birefringence Enhancement Activated Prepared via Alkaline-Earth-Metal Substitution by Tin, *Angew. Chem. Int. Ed.*, 2019, **58**, 17675-17678.
- [19] J. Y. Guo, S. C. Cheng, S. J. Han, Z. H. Yang, S. L. Pan, Sn<sub>2</sub>B<sub>5</sub>O<sub>9</sub>Br as an Outstanding Bifunctional Material with Strong Second-Harmonic Generation Effect and Large Birefringence, *Adv. Opt. Mater.*, 2021, **9**, 2001734-2001740.
- [20] B.V.Egorova, A. V. Olenev, P. S. Berdonosov, A. N. Kuznetsov, S. Yu. Stefanovich, V. A. Dolgikh, T. Mahenthirarajah, P. Lightfoot, Lead-strontium Borate Halides with Hilgardite-type Structure and their SHG Properties, *J. Solid State Chem.*, 2008, **181**, 1891-1898.
- [21] E. L. Belokoneva, A. G. Al-Ama, S. Y. Stefanovich, P. A. Plachinda, Crystal Structure of the Lead Bromo-Borate Pb<sub>2</sub>[B<sub>5</sub>O<sub>9</sub>]Br from Precision Single-Crystal X-ray Diffraction Data and the Problem of Optical Nonlinearity of Hilgardites, *Crystallogr. Rep.*, 2007, **52**, 795-800.
- [22] Y. Z. Huang, L. M. Wu, X. T. Wu, L. H. Li, L. Chen, Y. F. Zhang, Pb<sub>2</sub>B<sub>5</sub>O<sub>9</sub>I: An Iodide Borate with Strong Second Harmonic Generation, *J. Am. Chem. Soc.*, 2010, **132**, 12788-12789.
- [23] L. Liu, B. B. Zhang, F. F. Zhang, S. L. Pan, F. Y. Zhang, X. W. Zhang, X. Y. Dong, Z. H. Yang, Pb<sub>6</sub>Ba<sub>2</sub>(BO<sub>3</sub>)<sub>5</sub>X (X= Cl, Br): New Borate Halides with Strong Predicted Optical Anisotropies Derived from Pb<sup>2+</sup> and (BO<sub>3</sub>)<sup>3-</sup>, *Dalton Trans.*, 2015, **44**, 7041-7047.
